# Supplementary material for: Facile synthesis of a metal–organic framework-derived Mn2O3 nanowire coated three-dimensional graphene network for high-performance free-standing supercapacitor electrodes
Source: Royal Society of Chemistry journal article supplement (doi:10.1039/c6ta01377e), 2016-01-01
Supplement: c6ta01377e1.pdf [file c6ta01377e1.pdf]

Supporting information

**Facile synthesis of metal-organic framework-derived  $\text{Mn}_2\text{O}_3$  nanowires coated three-dimensional graphene network for high-performance free-standing supercapacitor electrodes**

Dong Ji<sup>a</sup>, Hu Zhou<sup>\*,b</sup>, Jian Zhang<sup>a</sup>, Yuanyuan Dan<sup>a</sup>, Hongxun Yang<sup>a</sup>, Aihua Yuan<sup>\*,a</sup>

<sup>a</sup>*School of Environmental and Chemical Engineering, Jiangsu University of Science and Technology, Zhenjiang 212003, P. R. China*

<sup>b</sup>*School of Material Science and Engineering, Jiangsu University of Science and Technology, Zhenjiang 212003, P. R. China*

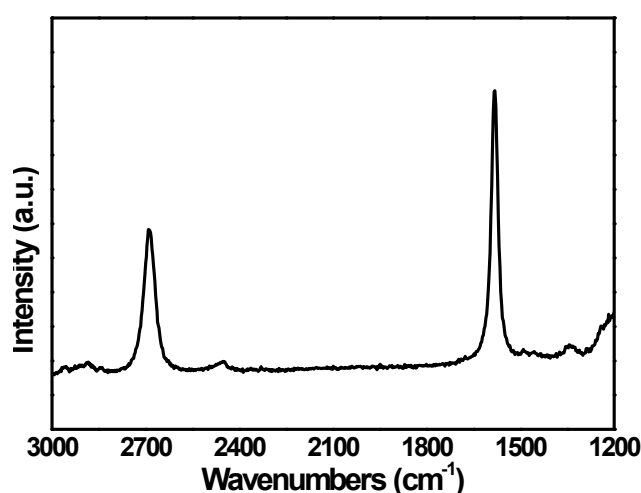

Fig. S1 Raman spectrum of 3DGN with Ni.

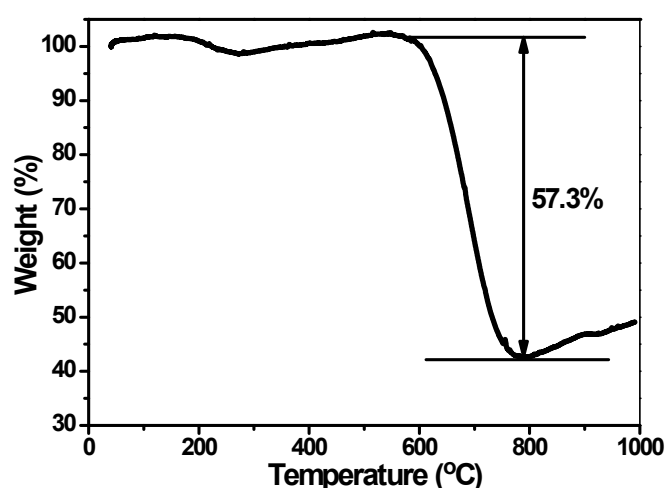

Fig. S2 TG curve of the 3DGN/ $\text{Mn}_2\text{O}_3$  composite.

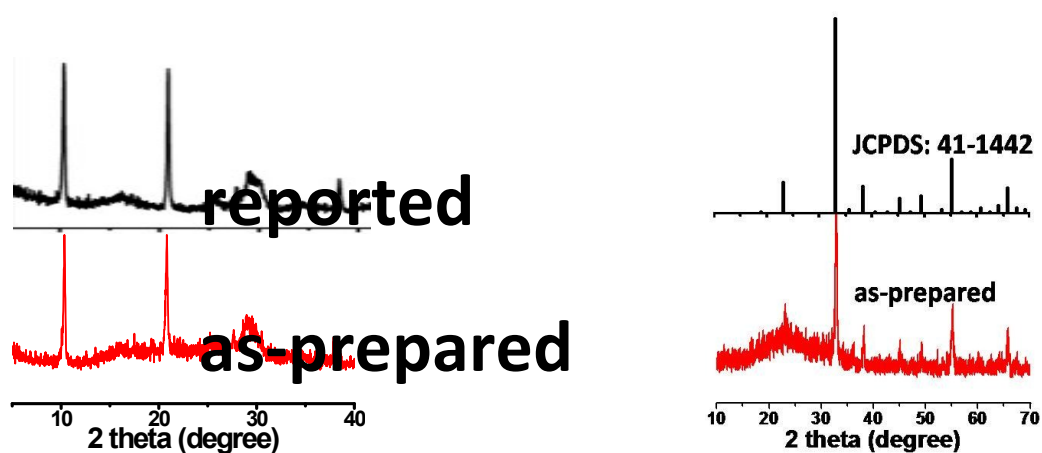

**Fig. S3** Powder XRD patterns of as-prepared and reported for Mn-BTC (left) and  $\text{Mn}_2\text{O}_3$  (right).

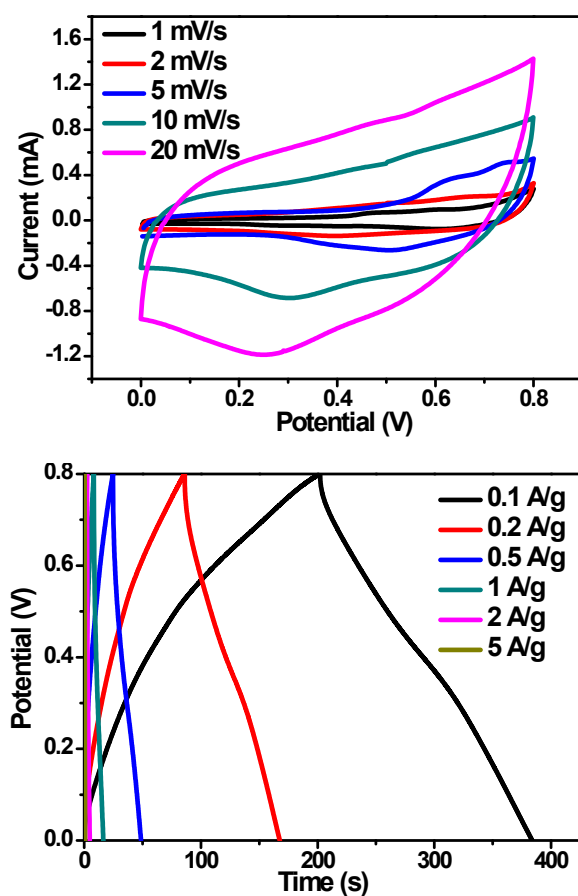

**Fig. S4** CV curves at different scan rates (left), and GCD curves at different current densities (right) of the Mn-BTC electrode material.

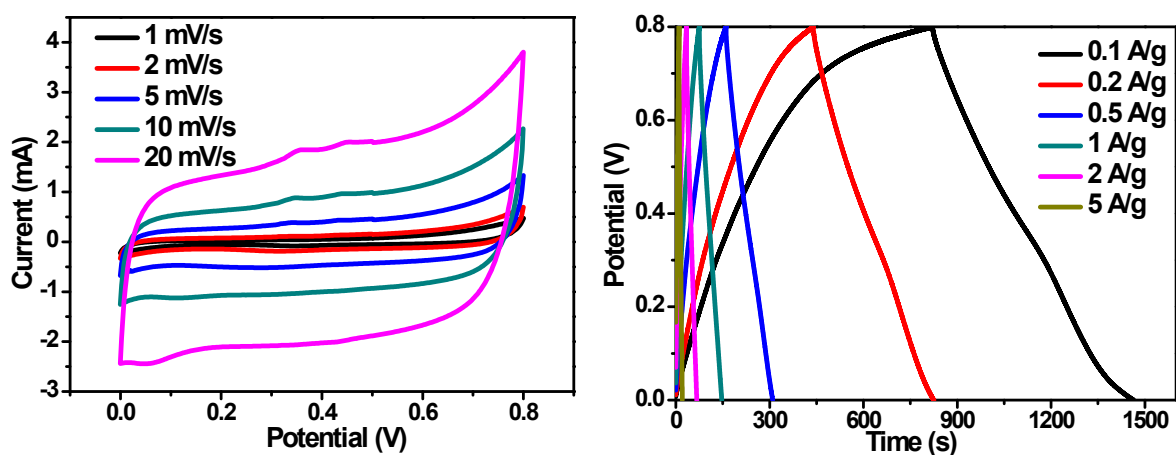

**Fig. S5** CV curves at different scan rates (left), and GCD curves at different current densities (right) of the  $\text{Mn}_2\text{O}_3$  electrode material.

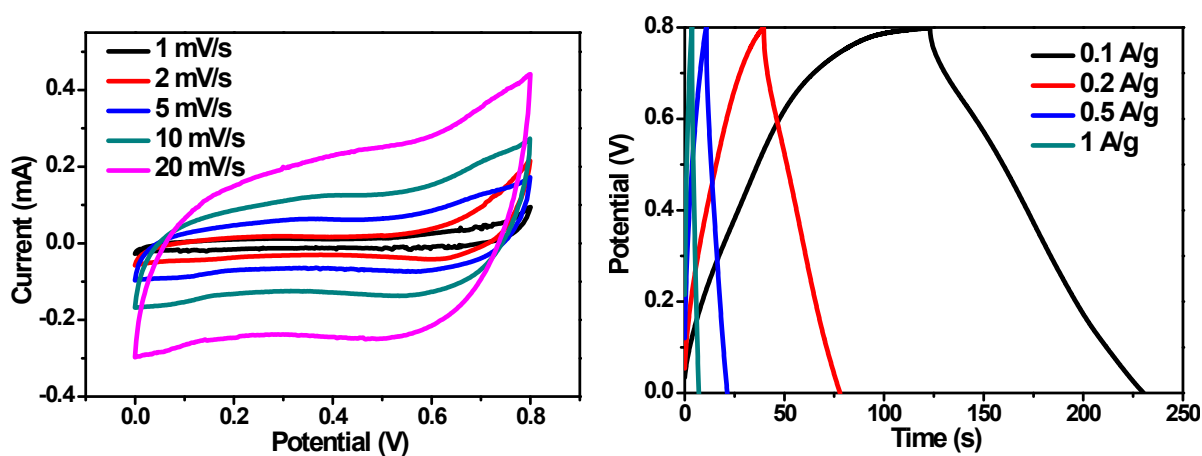

**Fig. S6** CV curves at different scan rates (left), and GCD curves at different current densities (right) of the 3DGN/Mn-BTC electrode material.

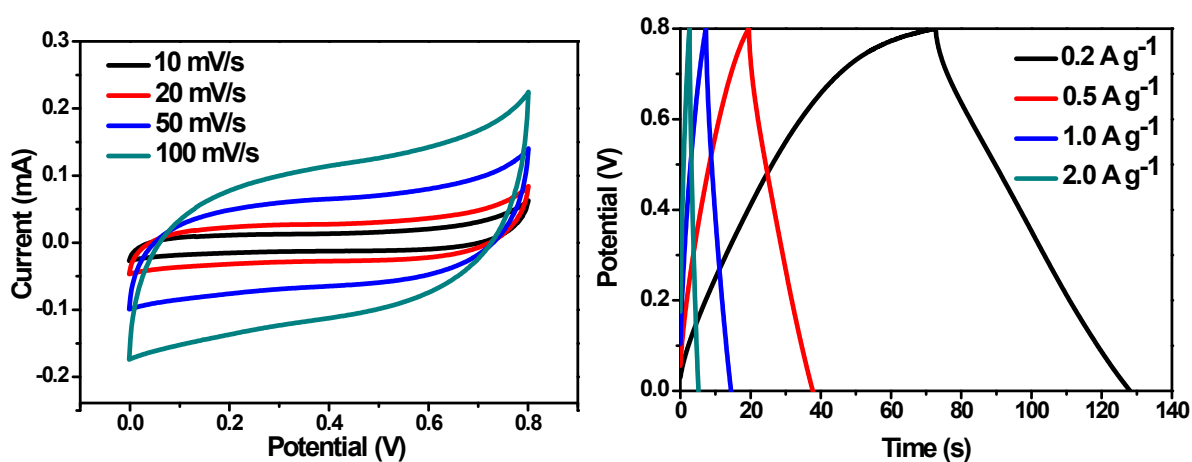

**Fig. S7** CV curves at different scan rates (left), and GCD curves at different current densities (right) of the 3DGN electrode material.

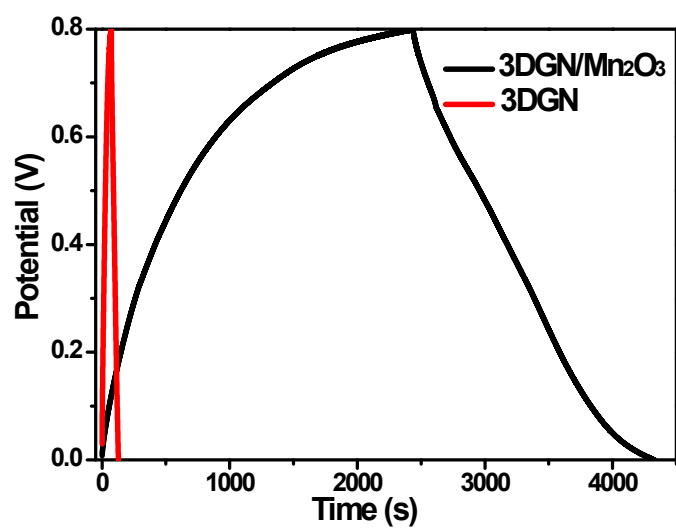

**Fig. S8** GCD curves at  $0.2 \text{ A g}^{-1}$  of the 3DGN and 3DGN/Mn<sub>2</sub>O<sub>3</sub> electrode materials.
